# Supplementary material
Source: PubMed Central journal article supplement (PMC9354729)
Supplement: NIHMS1738302-supplement-Supplemental_Material.pdf [file NIHMS1738302-supplement-Supplemental_Material.pdf]

Supplemental Table 1

*Demographic Differences in Bi+ Visibility Strategies*

|                   | Gender Based      | Community  |                   | Direct Disclosure |                     | Indirect   |                     | Behavioral Displays |            |
|-------------------|-------------------|------------|-------------------|-------------------|---------------------|------------|---------------------|---------------------|------------|
|                   | Displays          | Engagement | Engagement        | Engagement        | Engagement          | Engagement | Engagement          | Engagement          | Engagement |
|                   | Marginal          | Omnibus    | Marginal          | Omnibus           | Marginal            | Omnibus    | Marginal            | Omnibus             | Marginal   |
|                   | Means             | <i>F</i>   | Means             | <i>F</i>          | Means               | <i>F</i>   | Means               | <i>F</i>            | Means      |
| Sexual Identity   | 2.36              | 2.53       |                   | 4.18*             |                     | 3.64*      |                     | 1.81                |            |
| Bisexual          | 2.22              |            | 2.44              |                   | 3.07 <sup>a,c</sup> |            | 3.25 <sup>a</sup>   |                     | 2.68       |
| Pansexual         | 2.39              |            | 2.58              |                   | 3.29 <sup>b</sup>   |            | 3.58 <sup>b</sup>   |                     | 2.78       |
| Queer             | 2.42              |            | 2.64              |                   | 3.16 <sup>a,b</sup> |            | 3.40 <sup>a,b</sup> |                     | 2.63       |
| Other             | 2.18              |            | 2.37              |                   | 2.87 <sup>c</sup>   |            | 3.10 <sup>a</sup>   |                     | 2.37       |
| Sex/Gender        | 42.92**           | 6.41*      |                   | 21.27**           |                     | 11.35**    |                     | .25                 |            |
| Cisgender Women   | 2.29 <sup>a</sup> |            | 2.59 <sup>a</sup> |                   | 3.05 <sup>a</sup>   |            | 3.44 <sup>a</sup>   |                     | 2.58       |
| Cisgender Men     | 1.90 <sup>b</sup> |            | 2.33 <sup>b</sup> |                   | 2.86 <sup>b</sup>   |            | 3.05 <sup>b</sup>   |                     | 2.63       |
| Gender Minorities | 2.71 <sup>c</sup> |            | 2.60 <sup>a</sup> |                   | 3.34 <sup>c</sup>   |            | 3.48 <sup>a</sup>   |                     | 2.64       |
| Race/Ethnicity    | 2.83              | .13        |                   | .07               |                     | .26        |                     | .53                 |            |
| White             | 2.37              |            | 2.49              |                   | 3.09                |            | 3.34                |                     | 2.58       |
| POC               | 2.23              |            | 2.52              |                   | 3.07                |            | 3.24                |                     | 2.65       |
| Age               | 1.80              | 2.52       |                   | .43               |                     | 3.08       |                     | 1.10                |            |

\* $p < .05$ ; \*\*  $p < .001$ . Error  $df$  for  $F$  values range from 695 to 707. Superscript letters present results of these follow-up tests. Groups with the same superscript letter do not differ significantly from one another.

Supplemental Table 2

*Demographic Differences in Bi+ Visibility Strategies: Cohen's  $\delta$* 

|                                       | Gender-based<br>Displays | Community<br>Engagement | Direct<br>Communication | Indirect<br>Communication | Behavioral<br>Displays |
|---------------------------------------|--------------------------|-------------------------|-------------------------|---------------------------|------------------------|
| <b>Sexual Identity</b>                |                          |                         |                         |                           |                        |
| Bisexual vs. Pansexual                | .18                      | .16                     | .22                     | .26                       | .08                    |
| Bisexual vs. Queer                    | .21                      | .23                     | .11                     | .05                       | .06                    |
| Bisexual vs. Other                    | .04                      | .08                     | .29                     | .17                       | .30                    |
| Pansexual vs. Queer                   | .03                      | .07                     | .11                     | .21                       | .14                    |
| Pansexual vs. Other                   | .22                      | .26                     | .50                     | .47                       | .39                    |
| Queer vs. Other                       | .23                      | .34                     | .40                     | .23                       | .24                    |
| <b>Sex/Gender</b>                     |                          |                         |                         |                           |                        |
| Cisgender Women vs. Cisgender Men     | .48                      | .31                     | .24                     | .42                       | .05                    |
| Cisgender Women vs. Gender Minorities | .44                      | .01                     | .38                     | .01                       | .07                    |
| Cisgender Men vs. Gender Minorities   | .88                      | .33                     | .63                     | .41                       | .02                    |
| <b>Race/Ethnicity</b>                 |                          |                         |                         |                           |                        |
| White vs. POC                         | .13                      | .03                     | .01                     | .05                       | .07                    |

Supplemental Table 3

*Demographic Differences in Context of Bi+ Visibility Attempts*

| Context                                                                       | Sexual Identity | Omnibus ANCOVA <i>F</i> Values |                |        | Marginal Means for Sex/Gender |                   |                   |
|-------------------------------------------------------------------------------|-----------------|--------------------------------|----------------|--------|-------------------------------|-------------------|-------------------|
|                                                                               |                 | Sex/Gender                     | Race/Ethnicity | Age    | Ciswomen                      | Cismen            | Gender Minorities |
| At work                                                                       | .97             | 5.00*                          | .17            | 10.08* | 2.21 <sup>a,b</sup>           | 2.08 <sup>a</sup> | 2.44 <sup>b</sup> |
| At school                                                                     | 1.69            | 6.60*                          | .03            | 10.16* | 3.15 <sup>a,b</sup>           | 2.84 <sup>a</sup> | 3.36 <sup>b</sup> |
| In social settings that are not LGBT-specific                                 | 2.82            | 8.80**                         | .02            | .83    | 2.88 <sup>a</sup>             | 2.57 <sup>b</sup> | 2.95 <sup>a</sup> |
| In LGBT social settings (i.e., the broader LGBT community)                    | 2.15            | 3.74*                          | .98            | 2.99   | 3.98 <sup>a,b</sup>           | 3.76 <sup>a</sup> | 4.05 <sup>b</sup> |
| When you are out in public alone                                              | .95             | .64                            | 2.33           | 11.50* | 2.10                          | 2.05              | 2.16              |
| When you are out in public with a friend                                      | 1.77            | 7.46*                          | 1.13           | .79    | 2.72 <sup>a</sup>             | 2.58 <sup>a</sup> | 2.96 <sup>b</sup> |
| When you are out in public with your partner(s)                               | 2.44            | 4.51*                          | 3.47           | 2.76   | 3.26 <sup>a</sup>             | 3.20 <sup>a</sup> | 3.56 <sup>b</sup> |
| When you are out in public with a family member                               | 2.12            | 9.48**                         | .10            | 14.63* | 1.84 <sup>a</sup>             | 1.69 <sup>a</sup> | 2.07 <sup>b</sup> |
| When you are with people who are bi+                                          | 1.05            | 3.15                           | .24            | 1.08   | 3.84                          | 3.70              | 3.96              |
| When you are with people who are gay or lesbian                               | .64             | 2.12                           | 1.45           | .89    | 3.61                          | 3.51              | 3.73              |
| When you are with people who are straight                                     | 1.80            | 9.27**                         | .49            | .78    | 2.92 <sup>a</sup>             | 2.61 <sup>b</sup> | 3.04 <sup>a</sup> |
| When you are with someone who does not understand or accept your bi+ identity | 1.27            | 4.20*                          | .12            | 10.54* | 2.02 <sup>a,b</sup>           | 1.88 <sup>a</sup> | 2.22 <sup>b</sup> |
| When you are in same-gender relationships                                     | .48             | .24                            | 1.88           | .53    | 3.59                          | 3.53              | 3.51              |
| When you are in different-gender relationships                                | 1.75            | 21.40**                        | 2.03           | .20    | 3.46 <sup>a</sup>             | 2.84 <sup>b</sup> | 3.62 <sup>a</sup> |
| When you are single                                                           | 3.51            | 10.44**                        | .44            | 1.16   | 3.69 <sup>a</sup>             | 3.30 <sup>b</sup> | 3.76 <sup>a</sup> |

\* $p < .05$ ; \*\*  $p < .001$ . Error *df* for *F* values range from 428 (at school) to 688. Marginal means are not presented for sexual identity or race/ethnicity because no omnibus ANCOVAs were significant. Groups with the same superscript letter do not differ significantly from one another.

## Supplemental Table 4

*Demographic Differences in Context of Bi+ Visibility Attempts: Cohen's  $\delta$* 

| Context                                                                       | Ciswomen vs.<br>Cismen | Ciswomen vs.<br>Gender Minorities | Cismen vs.<br>Gender Minorities |
|-------------------------------------------------------------------------------|------------------------|-----------------------------------|---------------------------------|
| At work                                                                       | .12                    | .21                               | .32                             |
| At school                                                                     | .27                    | .19                               | .46                             |
| In social settings that are not LGBT-specific                                 | .33                    | .07                               | .40                             |
| In LGBT social settings (i.e., the broader LGBT community)                    | .20                    | .07                               | .28                             |
| When you are out in public alone                                              | .05                    | .06                               | .11                             |
| When you are out in public with a friend                                      | .14                    | .24                               | .38                             |
| When you are out in public with your partner(s)                               | .05                    | .26                               | .29                             |
| When you are out in public with a family member                               | .18                    | .24                               | .42                             |
| When you are with people who are bi+                                          | .13                    | .12                               | .25                             |
| When you are with people who are gay or lesbian                               | .10                    | .11                               | .21                             |
| When you are with people who are straight                                     | .33                    | .12                               | .43                             |
| When you are with someone who does not understand or accept your bi+ identity | .12                    | .16                               | .29                             |
| When you are in same-gender relationships                                     | .05                    | .07                               | .02                             |
| When you are in different-gender relationships                                | .53                    | .14                               | .71                             |
| When you are single                                                           | .38                    | .07                               | .46                             |

Supplemental Table 5

*Demographic Differences in Reasons for Bi+ Visibility Attempts*

|                   | Activism            |                   | Pride               |                   |
|-------------------|---------------------|-------------------|---------------------|-------------------|
|                   | Omnibus<br><i>F</i> | Marginal<br>Means | Omnibus<br><i>F</i> | Marginal<br>Means |
| Sexual Identity   | .68                 |                   | 5.83*               |                   |
| Bisexual          |                     | 3.84              |                     | 3.59 <sup>b</sup> |
| Pansexual         |                     | 3.98              |                     | 3.79 <sup>a</sup> |
| Queer             |                     | 3.87              |                     | 3.82 <sup>a</sup> |
| Other             |                     | 3.87              |                     | 3.20 <sup>c</sup> |
| Sex/Gender        | 9.79**              |                   | 12.39**             |                   |
| Cisgender Women   |                     | 4.04 <sup>a</sup> |                     | 3.66 <sup>a</sup> |
| Cisgender Men     |                     | 3.62 <sup>b</sup> |                     | 3.33 <sup>b</sup> |
| Gender Minorities |                     | 4.01 <sup>a</sup> |                     | 3.81 <sup>a</sup> |
| Race/Ethnicity    | 1.71                |                   | .03                 |                   |
| White             |                     | 3.83              |                     | 3.61              |
| POC               |                     | 3.95              |                     | 3.59              |
| Age               | 1.28                |                   | 1.48                |                   |

\* $p < .05$ ; \*\*  $p < .001$ . Error  $df$  for  $F$  values range from 670 to 676.

Superscript letters present results of these follow-up tests. Groups with the same superscript letter do not differ significantly from one another.

Supplemental Table 6

*Demographic Differences in Perceived Success of Bi+ Visibility Strategies*

|                   | Gender Based Displays |                | Community Engagement |                     | Direct Communication |                   | Indirect Communication |                | Behavioral Displays |                |
|-------------------|-----------------------|----------------|----------------------|---------------------|----------------------|-------------------|------------------------|----------------|---------------------|----------------|
|                   | Omnibus <i>F</i>      | Marginal Means | Omnibus <i>F</i>     | Marginal Means      | Omnibus <i>F</i>     | Marginal Means    | Omnibus <i>F</i>       | Marginal Means | Omnibus <i>F</i>    | Marginal Means |
| Sexual Identity   | 1.99                  |                | .86                  |                     | 3.08*                |                   | 2.18                   |                | 1.54                |                |
| Bisexual          |                       | 2.54           |                      | 3.57                |                      | 4.17 <sup>a</sup> |                        | 2.81           |                     | 3.20           |
| Pansexual         |                       | 2.67           |                      | 3.67                |                      | 4.20 <sup>a</sup> |                        | 2.87           |                     | 3.33           |
| Queer             |                       | 2.70           |                      | 3.61                |                      | 4.22 <sup>a</sup> |                        | 2.82           |                     | 3.18           |
| Other             |                       | 2.54           |                      | 3.57                |                      | 3.89 <sup>b</sup> |                        | 2.51           |                     | 3.04           |
| Sex/Gender        | 2.66                  |                | 3.07*                |                     | 5.12*                |                   | .79                    |                | .64                 |                |
| Cisgender Women   |                       | 2.67           |                      | 3.68 <sup>a</sup>   |                      | 4.23 <sup>a</sup> |                        | 2.80           |                     | 3.13           |
| Cisgender Men     |                       | 2.51           |                      | 3.51 <sup>b</sup>   |                      | 4.02 <sup>b</sup> |                        | 2.69           |                     | 3.23           |
| Gender Minorities |                       | 2.66           |                      | 3.62 <sup>a,b</sup> |                      | 4.10 <sup>b</sup> |                        | 2.76           |                     | 3.20           |
| Race/Ethnicity    | .03                   |                | .29                  |                     | 1.46                 |                   | .001                   |                | .69                 |                |
| White             |                       | 2.62           |                      | 3.59                |                      | 4.08              |                        | 2.75           |                     | 3.15           |
| POC               |                       | 2.61           |                      | 3.62                |                      | 4.15              |                        | 2.75           |                     | 3.22           |
| Age               | 13.80**               |                | 21.58**              |                     | 1.47                 |                   | .02                    |                | 3.51                |                |

\* $p < .05$ ; \*\*  $p < .001$ . Error *df* for *F* values range from 695 to 707. Superscript letters present results of these follow-up tests. Groups with the same superscript letter do not differ significantly from one another.

Supplemental Table 7

*Demographic Differences in Perceived Success of Bi+ Visibility Strategies: Cohen's  $\delta$* 

|                                       | Gender-based<br>Displays | Community<br>Engagement | Direct<br>Communication | Indirect<br>Communication | Behavioral<br>Displays |
|---------------------------------------|--------------------------|-------------------------|-------------------------|---------------------------|------------------------|
| <b>Sexual Identity</b>                |                          |                         |                         |                           |                        |
| Bisexual vs. Pansexual                | .17                      | .15                     | .04                     | .07                       | .15                    |
| Bisexual vs. Queer                    | .21                      | .06                     | .08                     | .01                       | .02                    |
| Bisexual vs. Other                    | .00                      | .00                     | .41                     | .37                       | .18                    |
| Pansexual vs. Queer                   | .04                      | .10                     | .03                     | .06                       | .17                    |
| Pansexual vs. Other                   | .18                      | .16                     | .46                     | .43                       | .33                    |
| Queer vs. Other                       | .23                      | .06                     | .52                     | .42                       | .15                    |
| <b>Sex/Gender</b>                     |                          |                         |                         |                           |                        |
| Cisgender Women vs. Cisgender Men     | .22                      | .25                     | .31                     | .13                       | .11                    |
| Cisgender Women vs. Gender Minorities | .01                      | .09                     | .22                     | .05                       | .08                    |
| Cisgender Men vs. Gender Minorities   | .20                      | .16                     | .12                     | .09                       | .03                    |
| <b>Race/Ethnicity</b>                 |                          |                         |                         |                           |                        |
| White vs. POC                         | .01                      | .04                     | .11                     | .00                       | .08                    |
